# Supplementary material
Source: publisher figshare collection journal article supplement (https://rs.figshare.com/ndownloader/files/14606495)
Supplement: Supplementary file 1 [file 14606495]

,Gzhelian,Asselian,Sakmarian,Artinskian,Kungurian,Roadian,Wordian,Capitanian,Wuchiapingian,Changhsingian,Induan,Olenekian,Anisian,Ladinian,Carnian ,Norian,Rhaetian
Mesosaurus,0,0,0,1,0,0,0,0,0,0,0,0,0,0,0,0,0
Milleretta,0,0,0,0,0,0,0,0,1,1,0,0,0,0,0,0,0
Australothyris,0,0,0,0,0,0,1,1,0,0,0,0,0,0,0,0,0
Microleter,0,0,0,1,0,0,0,0,0,0,0,0,0,0,0,0,0
Belebey,0,1,1,1,1,1,1,0,0,0,0,0,0,0,0,0,0
Bolosaurus,0,0,1,1,1,0,0,0,0,0,0,0,0,0,0,0,0
Eudibamus,0,0,0,1,0,0,0,0,0,0,0,0,0,0,0,0,0
Erpetonyx,1,0,0,0,0,0,0,0,0,0,0,0,0,0,0,0,0
Lanthanosuchus,0,0,0,0,0,0,1,0,0,0,0,0,0,0,0,0,0
Acleistorhinus,0,0,0,0,1,0,0,0,0,0,0,0,0,0,0,0,0
Delorhynchus,0,0,0,1,0,0,0,0,0,0,0,0,0,0,0,0,0
Colobomycter_pholeter,0,0,0,1,0,0,0,0,0,0,0,0,0,0,0,0,0
Colobomycter_vaughni,0,0,0,1,0,0,0,0,0,0,0,0,0,0,0,0,0
Feeserpeton,0,0,0,1,0,0,0,0,0,0,0,0,0,0,0,0,0
Nyctiphruretus,0,0,0,0,0,1,0,0,0,0,0,0,0,0,0,0,0
Abyssomedon,0,0,0,1,0,0,0,0,0,0,0,0,0,0,0,0,0
Owenetta,0,0,0,0,0,0,0,0,1,1,1,0,0,0,0,0,0
Barasaurus,0,0,0,0,0,0,0,0,0,1,1,1,0,0,0,0,0
Procolophon,0,0,0,0,0,0,0,0,0,0,1,1,0,0,0,0,0
Pareiasuchus,0,0,0,0,0,0,0,0,1,0,0,0,0,0,0,0,0
Scutosaurus,0,0,0,0,0,0,1,1,0,0,0,0,0,0,0,0,0
Bradysaurus,0,0,0,0,0,0,1,1,0,0,0,0,0,0,0,0,0
Macroleter,0,0,0,0,0,1,0,0,0,0,0,0,0,0,0,0,0
Bashkyroleter_mesensis,0,0,0,0,0,0,1,0,0,0,0,0,0,0,0,0,0
Bashkyroleter_bashkyricus,0,0,0,0,0,0,1,0,0,0,0,0,0,0,0,0,0
Emeroleter,0,0,0,0,0,0,1,0,0,0,0,0,0,0,0,0,0
Rhipaeosaurus,0,0,0,0,0,0,1,0,0,0,0,0,0,0,0,0,0
Nycteroleter,0,0,0,0,0,1,0,0,0,0,0,0,0,0,0,0,0
Ruhuhuaria,0,0,0,0,0,0,0,0,0,0,0,0,1,0,0,0,0
Sclerosaurus,0,0,0,0,0,0,0,0,0,0,0,0,1,0,0,0,0
Hypsognathus,0,0,0,0,0,0,0,0,0,0,0,0,0,0,1,1,0
Leptopleuron,0,0,0,0,0,0,0,0,0,0,0,0,0,0,1,1,0
Anomoiodon,0,0,0,0,0,0,0,0,0,0,0,0,1,0,0,0,0
